# 1 OmicsDB::Pathogens - A database for exploring 2 functional networks of plant pathogens

3 Bjoern Oest Hansen 1,2,3 Stefan Olsson 1,4

4 <sup>1</sup> *State Key Laboratory for Ecological Pest Control of Fujian and Taiwan Crops, College of  
5 Plant Protection, Fujian Agriculture and Forestry University, Fuzhou 350002, China.*

6 <sup>2</sup> *OmicsDriven, Toellose, Denmark*

7 <sup>3</sup> *Max Planck Institute of Molecular Plant Physiology, Am Muehlenberg 1, 14476 Potsdam,  
8 Germany*

9 <sup>4</sup> *Plant Immunity Center, Haixia Institute of Science and Technology, College of Life Science,  
10 Fujian Agriculture and Forestry University, Fuzhou 350002, China.*

11

## 12 Abstract

13 Plant pathogens are a great threat to food security. To combat them we need an  
14 understanding of how they work. Integrating large-scale omics datasets such as genomes  
15 and transcriptomes has been shown to provide deeper insights into many aspects of  
16 molecular biology. For a better understanding of plant pathogens, we aim to construct a  
17 platform for accessing genomic and gene co-expression networks for a range of pathogens  
18 and reference species. Currently we have integrated genomic and transcriptomics data from  
19 10 species (*Fusarium graminearum*, *Ustilago maydis*, *Blumeria graminis*, *Neurospora*  
20 *crassa*, *Schizosaccharomyces pombe*, *Saccharomyces cerevisiae*, *Escherichia coli*,  
21 *Arabidopsis thaliana*, *Mus musculus* and *Homo sapiens*).

22 Here we introduce OmicsDB::Pathogens (<http://pathogens.omicsdb.org>), a publicly available  
23 web portal with an underlying database containing genomic, and transcriptomic data and  
24 analysis tools. It allows non-bioinformaticians to browse genomic data and inspect and  
25 compare biological networks across species.

26 The information is modelled in a graph-based database, enabling flexibility for querying and  
27 future extensions. Tools such as BLAST and Cytoscape.js are available together with the  
28 option of performing GO enrichment analysis. The database also enables the user to browse  
29 information such as Orthologs, Protein domains and publications citing a given gene.

30 Herein we describe how to use this platform for generating hypotheses for the function of a  
31 gene.

32

### 33 **Availability and Implementation**

34 Currently, Omicsdb supports networks for 10 organisms and is freely available for public  
35 use at <http://pathogens.omicsdb.org>

36

## 37 **Introduction**

38 Plant pathogens are a great threat to the ever-growing population and the following need for  
39 food. To combat them, an understanding of their mode of action and of how the pathogenic  
40 processes work is essential. To be able to obtain useful knowledge from genomes, it is  
41 necessary to be able to correctly assign functions to gene products. Manual annotation is not  
42 a feasible option to annotate the ever-growing number of available genomes. Scientists,  
43 therefore, must rely more and more on predictions.

44 In-silico methods have gained popularity for automated annotation of gene functions, though  
45 for it to be useful, it is important that the accuracy of the predictions, and number of genes  
46 that can be annotated is high.

47 The guilt by association hypothesis is based on the observation that genes that participate in  
48 similar biological processes or are involved in similar regulatory pathways tend to display  
49 similar expression profiles ([Wolfe et al., 2005](#)). An increasingly popular method to utilize this  
50 observation is using gene co-expression networks. Networks are a convenient way of  
51 representing biological data and allow for the utilization of graph theory. By analysing the  
52 structure of the networks, it is possible to identify communities within the network, where the  
53 genes are more closely related to each other than to the rest of the network and are  
54 enriched for specific biological processes.

55 The two main applications for co-expression network analysis are 1) To use a bait-gene from  
56 a known pathway or with a known function, as a query, and identify possible genes within  
57 the same pathway or with a similar function (Itkin et al., 2013) and 2) to suggest the  
58 biological process or pathways given gene is involved in, based on the functions of its  
59 neighborhood. With the increase in available biological networks, an increasingly important

60 usage is the identification of common network patterns across species, this allows for more  
61 reliable transfer of knowledge from and across model species.

62 Inter-network comparisons serve multiple purposes, they can improve identification of  
63 functionally related orthologs across species (Hansen et al., 2014), and aid in the  
64 identification of conserved subgraphs within or across species (Stuart et al., 2003).

65

66 The amount of data a researcher working within molecular biology needs to handle has  
67 grown exponentially during later years. Not just does that put a heavy load on the IT  
68 infrastructure, but also on the researcher that might not be a bioinformatics specialist.

69 Handling and processing omics data are often a requirement these days, to be able to  
70 perform analysis on this kind of data, researchers need to be familiar with scripting  
71 languages such as Python or R.

72

73 Curated databases have shown to be powerful tools for integration and analysis of data.  
74 This has led to an emergence of integrated web-based databases, changing the analysis of  
75 networks from being a task for specialist bioinformaticians, into a simple routine task for  
76 experimental molecular biologists, investigating specific genes or conditions. However, most  
77 of these databases focus on the major model species, such as Maize ([Andorf et al., 2016](#)),  
78 Budding yeast (Kim et al., 2014) or fission yeast ([Vo et al., 2016](#)). There exist very few  
79 options for researchers working on non-model species.

80 Plant pathogens have until now had little representation in these databases. Electronic  
81 resources for *Fusarium graminearum* eFG (Liu et al., 2013) a model species in plant  
82 pathology (Zhang et al., 2019), contains functional annotation as well as annotations of  
83 transcription factors and curated and predicted pathogenic genes for fusarium. PHI-base  
84 (Urban et al., 2017) is a great resource for curated Pathogen-Host Interactions but is  
85 manually curated and thus limited in size. PhytoPath (Pedro et al., 2016), is a resource for  
86 genomic information related to plant pathogens. Other databases with microbial data that  
87 cover mainly model species are also available (Kim et al., 2014, 2015; Oughtred et al., 2019)

88

89 To tackle this problem, we here present OmicsDB::Pathogens, an integrated database of  
90 networks from 8 species: 6 model species (*Escherichia coli*, *Saccharomyces cerevisiae*,  
91 *Saccharomyces pombe*, *Arabidopsis thaliana*, *Mus musculus*, *Homo sapiens*), and 4 plant  
92 pathogens (*Fusarium graminearum*, *Ustilago maydis*, *Blumeria graminis*, *Neurospora crassa*  
93 *and Magnaporthe oryzae*), as well as orthologs from 158 other fungal pathogens, to ease  
94 the knowledge transfer to and from these.

95

96 OmicsDB:: Pathogens is a database developed to assist experimental molecular biologists in  
97 accessing and analyzing omics data.  
98 The database provides intuitive navigation, allowing the researchers to store, browse,  
99 analyse and compare their data, as well as handling metadata of both samples and  
100 workflows. Another important use of the database is that it allows comparisons between  
101 species that can allow the experimental researcher not just to infer possible functions of  
102 genes not previously studied experimentally in detail. It also makes it possible to rank genes  
103 of interest to study enabling more focussed research in sorting out gene function. We  
104 provide an extensive amount of already processed publicly available genomic and  
105 transcriptomic data.

## 106 Results and discussion

107 OmicsDB is a database that includes high throughput experimental data and information for  
108 multiple species. Since we store data from biological networks, it was decided to go for the  
109 graph-based database Neo4J for storing most of the data. Neo4J has previously been  
110 evaluated by Have and Jensen for several graph processing problems related to  
111 bioinformatics and compared with PostgreSQL, they found Neo4J to be faster in many  
112 cases, though they also conclude that graph-based databases are not necessarily the best  
113 choice for all problems (Have and Jensen, 2013). Neo4J uses the property graph model,  
114 which means that nodes and edges can have key/value properties associated. Neo4J uses  
115 its own query language, Cypher for querying the graph, cypher allows queries to be  
116 formulated in terms of paths, which allows them to be concise and intuitive compared with  
117 equivalent SQL queries, which is often complicated by joins, and difficult to read. Due to the  
118 simplicity of traversing edges, and accessing data through the Cypher language, we decided  
119 to use Neo4J for all data gene expression data, that is stored in an SQLite database, and flat  
120 files that are stored in an S3 compatible object storage, with their paths and metadata stored  
121 in Neo4J linked to the relevant organism. A simplified overview of our Neo4J data model can  
122 be seen in Fig. 1 An overview of the infrastructure and data processing steps can be seen in  
123 Fig. 2. The processed expression data is stored in a SQL database, with common identifiers  
124 shared between the other systems.

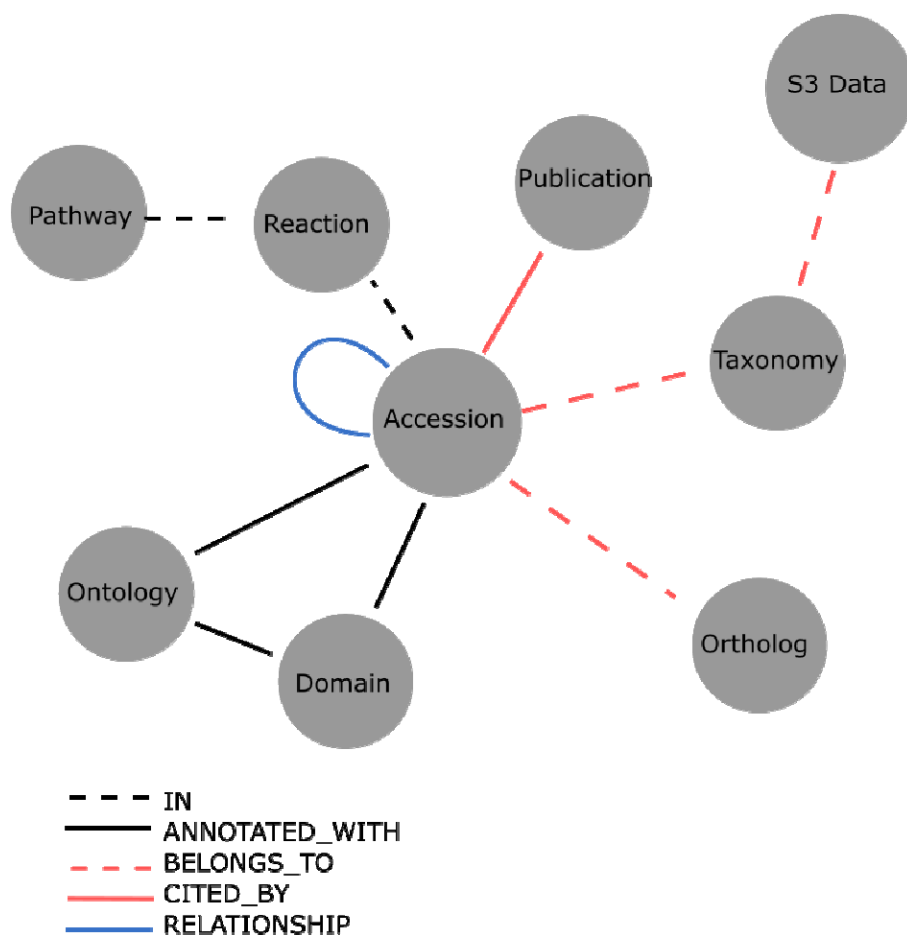

125

126 *Fig 1. The part of our Neo4J data model. This shows how the different nodes are related.*  
127 *Properties are left out for simplicity. Gathering data across any node is easy, for example, if*  
128 *one wishes to know all publications related to a given Domain its possible to traverse the*  
129 *graph from Domain over Accession to Publication. We believe this gives a more intuitive way*  
130 *of accessing data than through a classical relational database.*

131 FASTA and GFF files, are stored using an S3 compatible object storage (Palankar et al.,  
132 2008), together with their respective indexes. Accessing this information is easy since we  
133 can traverse the graph from a given Accession to the S3 data, and use the Accession  
134 together with the file index to drag out only what we need from the flat-file, while benefiting  
135 from the features of S3 buckets, especially scalability and accessibility across servers.

136 To ease access to our data, we developed a web-based interface for OmicsDB::Pathogens  
137 (<http://pathogens.omicsdb.org>). An overview of the website is shown in Fig 3. The site is  
138 centered around gene information pages, where each page tries to summarize the  
139 knowledge about a given gene, Users can search for the genes of interest using keywords,  
140 gene identifiers or by performing a BLAST search against their sequence of interest.

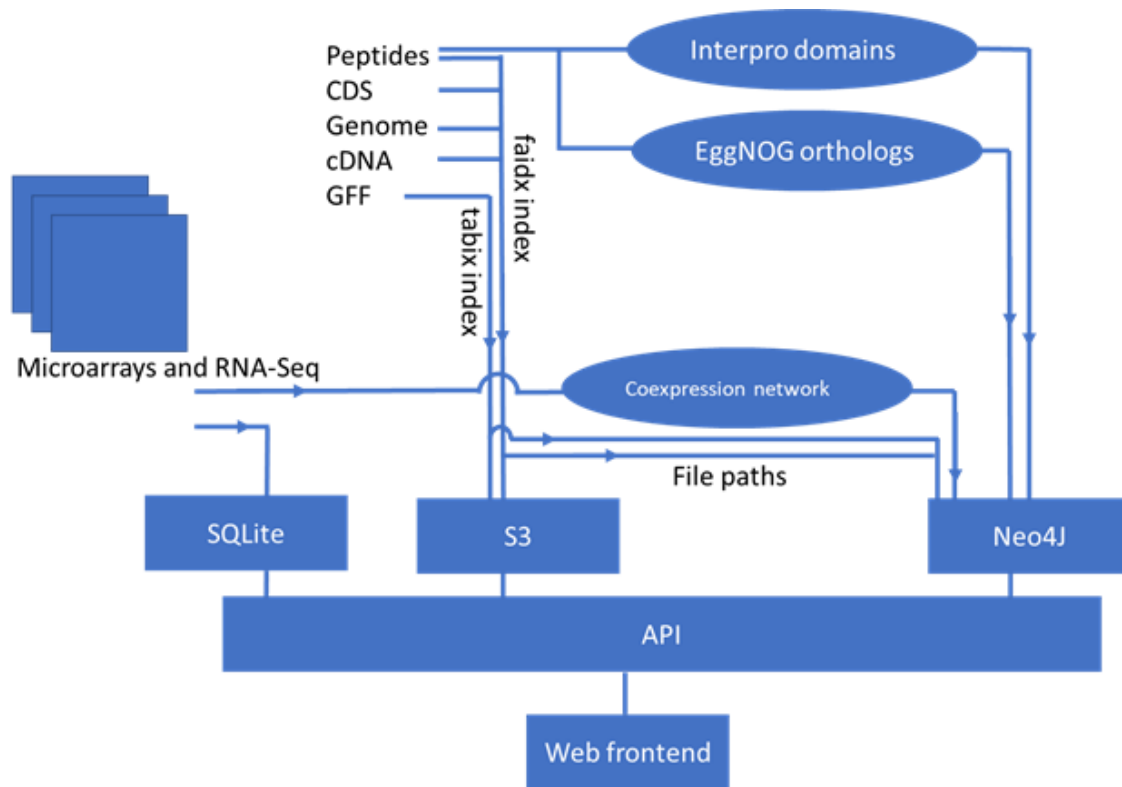

141

142 *Figure 2. Storage and pipelines included in the data processing and storage. Microarray and*  
143 *RNA-seq data are stored processed and normalized (not shown). The TPMs are then stored*  
144 *in an SQLite database. The TPMs is also processed to generate a co-expression network,*  
145 *stored in Neo4J. Peptide, CDS, cDNA, Genomes and GFF files are stored in an S3*  
146 *compatible object storage, together with their respective faidx and tabix indexes* ([Li et al.,](#)  
147 [2009; Li, 2011](#)). Peptide sequences are processed by eggNOG ([Huerta-Cepas et al., 2016](#))  
148 *to identify ortholog families, and by InterProScan to find conserved domains. Both orthologs*  
149 *and domains are stored in Neo4J, connected to their respective peptides.*

150 Basic functions of OmicsDB::Pathogens

151 The main source of information is the gene page that offers important information regarding  
152 each gene. It provides different information for each gene. An overview can be seen in Fig 3.

153 The top of the page (Fig 3A) shows the basic information: The gene model with intron and  
154 exon information. Gene Ontology annotations (Ashburner et al., 2000). Ortholog groups from  
155 EggNOG (Huerta-Cepas et al., 2016) and protein domains from InterProScan (Hunter et al.,  
156 2009; Jones et al., 2014) and the coding DNA sequence and the protein sequence. Further  
157 down the page (Fig 3B) is a list of co-expressed genes and a visualization of the co-  
158 expression network. As well as A bar chart of gene expression displaying the average of  
159 replicates for a given experiment (Fig 3C).

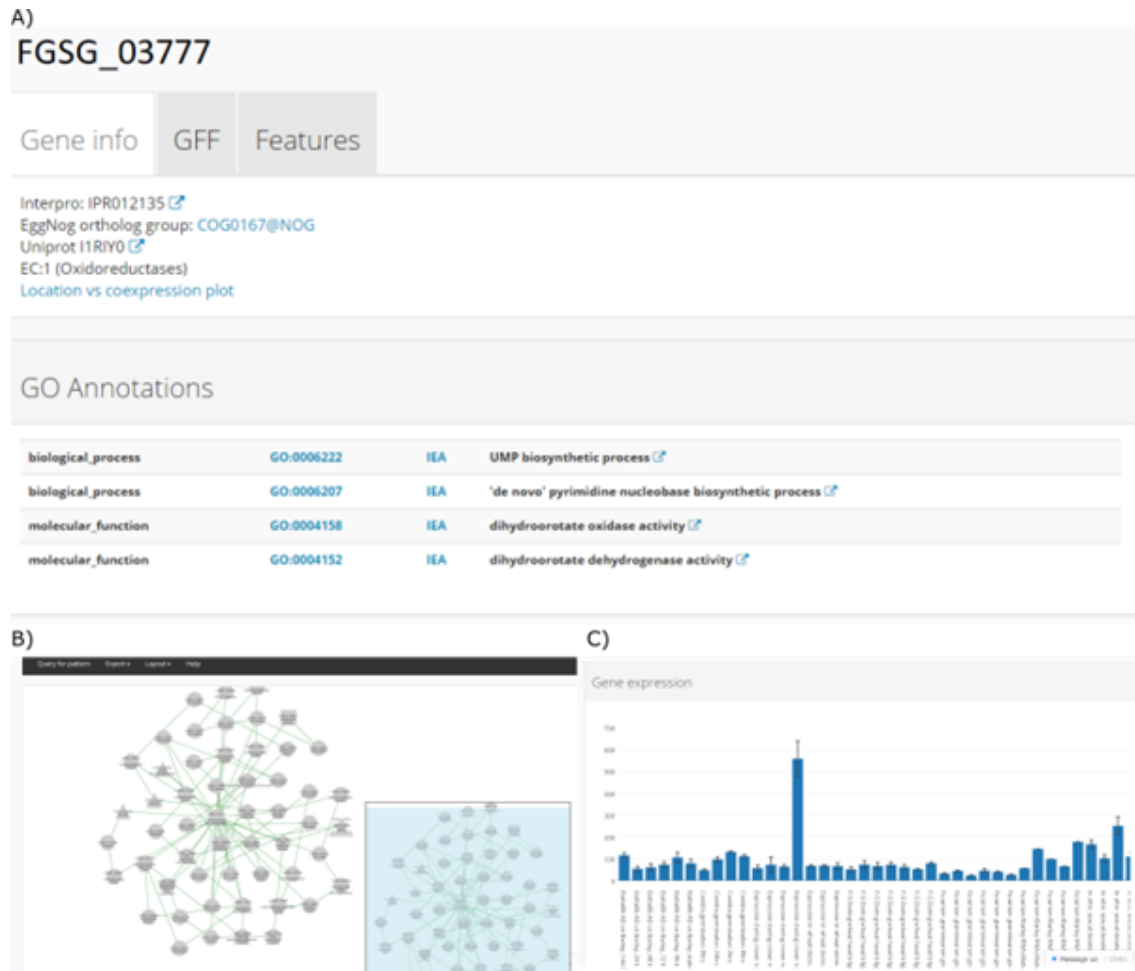

160

161 Fig 3. An example of the gene profile page. A) Shows the structural and functional  
162 information on the gene as well as ortholog information, possible pathways, and InterPro  
163 domains. B) Shows an example of a co-expression network. C) Shows the expression profile  
164 of a given gene. Both A, B and C are found on the same page in the browser.

165

166 This page also serves as a gateway to explore the information within and across species.  
167 For the species without networks, this data is limited to protein domains, ortholog families,  
168 DNA and protein sequences.

169 The network representation of gene interactions allows the users to query for the pattern of  
170 co-regulated orthologs across other species, to see if this regulated “module” is preserved.  
171 This function can ease the annotation transfer of “biological process” terms, relying not only  
172 on sequence similarity but also on the biological context.

173 To give a quick overview of what types of proteins the genes in the network code for, shapes  
174 of the nodes are used. The default shape is round, but it will be given a different shape in the  
175 case of transcription factors, or if a protein is classified with one of the 1-6 Enzyme

176 commission classifications ([Cornish-Bowden, 2014](#)). The node representing the bait gene is  
177 displayed in red. An overview of the shapes can be found in Supplementary Table 1. To  
178 represent different types of relationships, the edges are colored using the following scheme,  
179 Green edges: co-expression, red edges: physical interaction, blue edges: genetic interaction.  
180 The physical and genetic interactions are from The BioGrid database ([Oughtred et al.,  
181 2019](#)), the co-expression data is calculated using the Mutual Rank (MR) method ([Obayashi  
182 et al., 2009](#)) modified to 1/MR with a MR threshold of 50.  
183  
184 From the gene page is it possible to access other pages with information. Ortholog pages:  
185 Each EggNOG ortholog family has a dedicated page, with aggregated information on this  
186 family. Including genes and species in the family, functional annotations as well as papers  
187 citing the family. This enables users to easily check at a glance what information is available  
188 from other species. As well as how diverse the family is by visualizing the distribution of  
189 members per species in a pie chart. An example of an ortholog page can be seen in Fig 4.  
190 Domain pages are similar to ortholog pages, but centred around a domain, for example,  
191 PF00331 or PS51760.

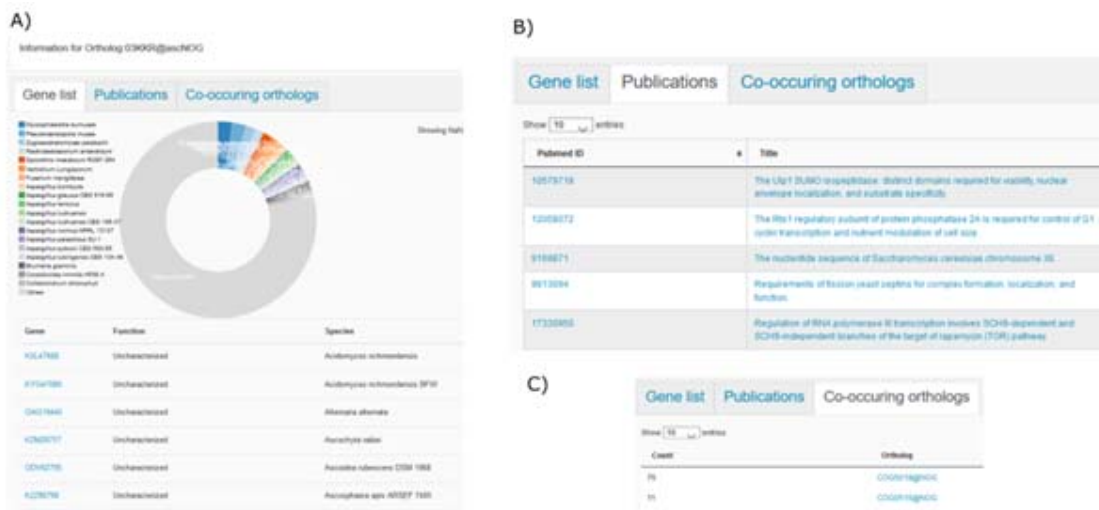

192

193 *Fig 4. Each Ortholog has a unique page with multiple tabs. A) it shows all that has been*  
194 *assigned and the species they belong to. It is possible to sub select species using the pie*  
195 *chart. The other tabs include B) publications citing genes within this ortholog group. As well*  
196 *as C) orthologs that co-occur across the networks. Orthologs that often co-occur hints that*  
197 *they might participate in a similar process.*

198 The Gene Ontology(Ashburner et al., 2000) has also been integrated, with pages for each  
199 term, displaying all genes annotated with a given ontology term, as well as the position of the  
200 term in the GO graph. It is thus possible to find networks in one species that resembles



201 those affiliated with a certain ontology in another species. Traditionally the user would have  
202 had to download and annotate both datasets. However here it can be done with the click of a  
203 button.

## 204 Advanced functions

205 OmicsDB also provides some tools enabling users to perform more advanced analyses. One  
206 example is cross-species network alignment. Cross-species comparisons of biological  
207 networks with interactions are still an emerging field, It allows for finding network patterns  
208 that between orthologous genes across species, hinting towards similar function. This has  
209 been used successfully in plants (Usadel et al., 2009; Movahedi et al., 2012; Hansen et al.,  
210 2014). Most work on gene function prediction using gene co-expression so far has been  
211 working on single or few species. Identifying conserved co-expression patterns across  
212 orthologs in different species can identify highly relevant candidate genes sharing similar  
213 functions or participate in the same pathway (Movahedi et al., 2012; Hansen et al., 2014).

214 An example of such a strategy with experimental confirmation is the study by Itkin et al.,  
215 where comparative co-expression for tomato and potato was utilized, leading to the  
216 discovery of a gene cluster that is related to the steroidal glycoalkaloids pathway (Itkin et al.,  
217 2013).

218 It is also possible to use the surrounding network and look for enriched GO terms, using a  
219 hypergeometric test. This is done at the bulk analysis page. Where a list of genes can be  
220 analysed. A plot of the expression values for all genes in the list will be generated as well as  
221 the GO enrichment. It is also possible to export both GO enrichments as well as peptide and  
222 CDS sequences in fasta format.

## 223 Use case: Vacuolar iron uptake

224 Yeast Fet3/Ftr1 (YMR056W/YER145C) are genes for two proteins that are in yeast high-  
225 affinity iron uptake at the plasma membrane (Askwith et al., 1994, 3; Stearman et al., 1996).  
226 The proteins physically connect to each other. Ftr1 is a transporter and Fet3 is an  
227 oxidoreductase. A similar system Fet5/Fth1 (YFL071W/YBR207W) exists at the vacuolar  
228 membrane and is involved in regulating vacuolar iron storage (Urbanowski and Piper, 1999)

229 In *Fusarium graminearum* FGSG\_02143 is known to be the plasma membrane Ftr1-like  
230 protein and the homologous protein FGSG\_05160 is probably the Fth1-like protein located at  
231 the vacuole membrane. To test if this can be the case FGSG\_05160 was used as bait and

232 the result is displayed together with the networks for yeast Ftr1 and Fth1. The aligned  
233 network can be seen in Fig. 5. Red edges represent possible orthologs and black edges co-  
234 expression within the species. The subcellular location for some genes products in Yeast  
235 has been marked.

236 What can be seen is that the vacuolar and the plasma-membrane iron transport is more co-  
237 regulated in the *F. graminearum* data than in the yeast data (direct strong co-regulation  
238 between FGSG\_05160 and FGSG\_02143). The pattern of co-regulation of the other proteins  
239 with orthologues in yeast also supports that FGSG\_05160 is a vacuolar located Fth1-  
240 orthologue. This has, however, to be confirmed by direct experiments.

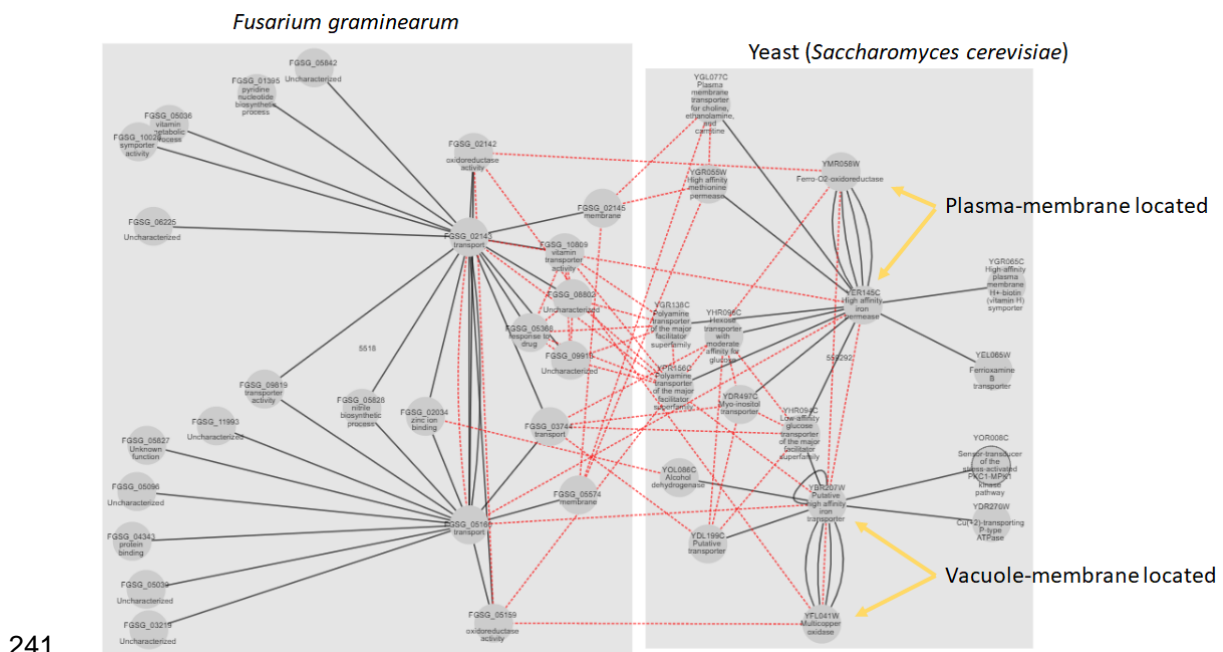

242 Fig 5. The alignment of the co-expression neighbourhoods from Yeast and *F. graminearum*,  
243 Using FGSG\_05160 as a bait, and searching for counterparts in Yeast with similar co-  
244 expression patterns. Black edges represent co-expression edges, red edges represent  
245 possible orthologous relationship. It can be seen that large parts of the network are mirrored  
246 across the organisms, hinting towards the genes carrying out the same functionality.

## 247 Conclusions and future directions

248 In this study, we developed a system for handling biological omics data. We processed gene  
249 expression data, as well as generated co-expression networks for 10 species.

250 We established an interactive web interface [omicsdb.org](https://omicsdb.org) to provide access to the data as  
251 well as the analysis platforms for the public. We plan to continue to improve the quality and  
252 functionality of this database, by regularly updating with new publicly available data.

253 Currently the database contains networks for 4 pathogens and 6 references, however, there  
254 is a growing need for understanding how plant pathogens work, to alleviate this need we will  
255 include new species as when they become available.

## 256 Materials and methods

### 257 External tools

258 BLAST+ (Camacho et al., 2009) has been integrated to enable the users to easily find their  
259 gene of interest, allowing the user to BLAST their bait sequence against our database. This  
260 is practical in case they have identifiers not present in our database, or the user working on  
261 species not yet included.

262

### 263 Construction of gene co-expression data

264 For the construction of co-expression database for plant pathogens, we selected 4  
265 pathogenic species (*Fusarium graminearum*, *Ustilago maydis*, *Blumeria graminis*,  
266 *Neurospora crassa*), based on the availability of gene expression data, as well as 6  
267 reference species (*Escherichia coli*, *Schizosaccharomyces pombe*, *Saccharomyces*  
268 *cerevisiae*, *Arabidopsis thaliana*, *Mus musculus*, *Homo sapiens*).

269 Expression data were downloaded from Arrayexpress (Kolesnikov et al., 2015), and  
270 normalized using the following methods: For Agilent data, the R-package limma (Ritchie et  
271 al., 2015) were used . For Affymetrix, Affymetrix PowerTools v. was used, running the RMA  
272 algorithm. For NimbleGen, DEVA V 1.02 (Roche) was used. RNA-Seq data were subjected  
273 to QC using FastQC (Andrews), reads were mapped using TopHat2 (Kim et al., 2013),  
274 counted using HTseq-count (Anders et al., 2015) and normalized using the VST algorithm  
275 implemented in DESeq2 (Love et al., 2014), run in R v. 3.4 (R Core Team, 2013).

276 Genome annotations were derived from Pombase for *S. pombe* (Wood et al., 2012), SGD for  
277 *S. cerevisiae* (Cherry et al., 1998), and Ensembl for the remaining species.

278 Transcription factor annotations were downloaded from (Liu et al., 2013), Enzyme  
279 Commission numbers were obtained from Uniprot (The Uniprot Consortium, 2019). Biological,  
280 chemical and genetic interactions were derived from BioGrid (Oughtred et al., 2019).

281

282 The Mutual Rank value of the weighted Pearson's correlation coefficient was used as the  
283 measure of co-expression, as described by (Obayashi et al., 2009). A threshold of 50 was  
284 applied. To make it comparable with protein interactions, the MR was normalized by taking  
285 1/MR ensuring that 1 was equivalent to the best value. Mutual Rank is calculated as

286

287 
$$MR(A,B) = \sqrt{(\text{Rank}(A \rightarrow B) \times \text{Rank}(B \rightarrow A))}$$

288

289 With A and B represent genes. GFF files were stored in tabix format (Li, 2011) peptide and  
290 DNA sequences were stored in faidx format implemented in Samtools (Li et al., 2009).

## 291 Functional Annotations

292 Protein domains including PFAM domains (Finn et al., 2014) and Panther (Mi et al., 2013)  
293 were identified using InterProScan v. 5.29-68.0 (Hunter et al., 2009; Jones et al., 2014),

294 Ortholog groups were identified using EggNOG (Huerta-Cepas et al., 2016), which also  
295 provided predicted GO terms. For *E. coli*, *S. pombe*, *S. cerevisiae*, *A. thaliana*, *M. musculus*  
296 and *Homo Sapiens*, experimentally validated GO terms could be downloaded from the  
297 GeneOntology website (The Gene Ontology Consortium, 2019). The Gene Ontology website  
298 also provides mappings from domains identified by InterProScan to their associated GO  
299 terms. These maps were used to further improve the annotations.

300 Papers citing a given gene or gene family were retrieved from Uniprot (The Uniprot  
301 Consortium, 2019).

302 For reference, *Arabidopsis thaliana*, *Mus musculus* and *Homo sapiens* were included,  
303 annotations were derived similarly to the pathogens.

## 304 Network alignment

305 The network alignment uses the “@NOG” ortholog families, if you provide a bait gene, it will  
306 query all other genes from this family, and compare how many orthologs are shared in the  
307 1st-degree neighbourhood. To calculate how much of the network around two genes is  
308 similar, the Jaccard index for the gene families shared across the networks is then  
309 calculated following

$$310 \quad J(A, B) = \frac{|A \cap B|}{|A \cup B|}$$

311 Where A and B represent the gene families in the network surrounding your bait gene and  
312 the gene it is compared against respectively. The numerator is the intersection of gene  
313 families, and denominator represents the union of all gene families in the 1st-degree  
314 neighbourhood.

## 315 Ontology Enrichment

316 Enrichment of Gene Ontology terms in sets of genes is calculated using the Hypergeometric  
317 distribution function, implemented in Scipy (Virtanen et al., 2020). For the calculation of  
318 background terms, following the true path rule, all ancestors of any given annotation are  
319 considered.

## 320 Database implementation

321 The system runs on Linux v. 18.04 LTS Bionic Beaver. The web-service was implemented in  
322 a Python-based web application framework, Flask v. 1.0.2, with SQLite and Neo4J 3.4  
323 ([www.neo4j.com](http://www.neo4j.com)) as the backend databases for the expression data and everything else  
324 respectively. The website is being served using gunicorn and NGINX. The co-expressed  
325 gene networks as well as the directed acyclic graphs for the GO terms were visualized using  
326 Cytoscape.js v. 3.14 (Franz et al., 2016), gene expression plots were generated using dc.js  
327 (<https://dc-js.github.io/dc.js/>). For the HTML page layout, the bootstrap framework was used  
328 ([www.getbootstrap.com](http://www.getbootstrap.com)), and for general purpose usability features the JQuery.js library  
329 (<https://jquery.com>) was used

330 BLAST+ (Camacho et al., 2009) was installed and a custom HTML interface was developed.  
331 Icons were obtained from Font Awesome v. 5 ([www.fontawesome.com](http://www.fontawesome.com)).

## 332 Conflict of Interest

333 No conflicts are declared.

## 334 Author Contributions

335 BOH and SO designed the study, BOH developed the database and processed the data.  
336 BOH and SO wrote the manuscript

## 337 References

- 338 Anders, S., Pyl, P. T., and Huber, W. (2015). HTSeq—a Python framework to work with  
339 high-throughput sequencing data. *Bioinformatics* 31, 166–169.  
340 doi:10.1093/bioinformatics/btu638.
- 341 Andorf, C. M., Cannon, E. K., Portwood, J. L., Gardiner, J. M., Harper, L. C., Schaeffer, M.  
342 L., et al. (2016). MaizeGDB update: new tools, data and interface for the maize  
343 model organism database. *Nucleic Acids Res.* 44, D1195-1201.

- 344 doi:10.1093/nar/gkv1007.
- 345 Andrews, S. FastQC: a quality control tool for high throughput sequence data. Available at:  
346 <http://www.bioinformatics.babraham.ac.uk/projects/fastqc> [Accessed June 25, 2019].
- 347 Ashburner, M., Ball, C. A., Blake, J. A., Botstein, D., Butler, H., Cherry, J. M., et al. (2000).  
348 Gene ontology: tool for the unification of biology. The Gene Ontology Consortium.  
349 *Nat. Genet.* 25, 25–29. doi:10.1038/75556.
- 350 Askwith, C., Eide, D., Van Ho, A., Bernard, P. S., Li, L., Davis-Kaplan, S., et al. (1994). The  
351 FET3 gene of *S. cerevisiae* encodes a multicopper oxidase required for ferrous iron  
352 uptake. *Cell* 76, 403–410. doi:10.1016/0092-8674(94)90346-8.
- 353 Camacho, C., Coulouris, G., Avagyan, V., Ma, N., Papadopoulos, J., Bealer, K., et al.  
354 (2009). BLAST+: architecture and applications. *BMC Bioinformatics* 10, 421.  
355 doi:10.1186/1471-2105-10-421.
- 356 Cherry, J. M., Adler, C., Ball, C., Chervitz, S. A., Dwight, S. S., Hester, E. T., et al. (1998).  
357 SGD: *Saccharomyces* Genome Database. *Nucleic Acids Res* 26, 73–79.  
358 doi:10.1093/nar/26.1.73.
- 359 Cornish-Bowden, A. (2014). Current IUBMB recommendations on enzyme nomenclature  
360 and kinetics. *Perspectives in Science* 1, 74–87. doi:10.1016/j.pisc.2014.02.006.
- 361 Finn, R. D., Bateman, A., Clements, J., Coggill, P., Eberhardt, R. Y., Eddy, S. R., et al.  
362 (2014). Pfam: the protein families database. *Nucleic Acids Res.* 42, D222-230.  
363 doi:10.1093/nar/gkt1223.
- 364 Franz, M., Lopes, C. T., Huck, G., Dong, Y., Sumer, O., and Bader, G. D. (2016).  
365 Cytoscape.js: a graph theory library for visualisation and analysis. *Bioinformatics* 32,  
366 309–311. doi:10.1093/bioinformatics/btv557.
- 367 Galagan, J. E., Calvo, S. E., Borkovich, K. A., Selker, E. U., Read, N. D., Jaffe, D., et al.  
368 (2003). The genome sequence of the filamentous fungus *Neurospora crassa*. *Nature*  
369 422, 859–868. doi:10.1038/nature01554.
- 370 Giaever, G., Chu, A. M., Ni, L., Connelly, C., Riles, L., Véronneau, S., et al. (2002).  
371 Functional profiling of the *Saccharomyces cerevisiae* genome. *Nature* 418, 387–391.  
372 doi:10.1038/nature00935.
- 373 Hansen, B. O., Vaid, N., Musialak-Lange, M., Janowski, M., and Mutwil, M. (2014).  
374 Elucidating gene function and function evolution through comparison of co-  
375 expression networks of plants. *Front. Plant Sci.* 5. doi:10.3389/fpls.2014.00394.
- 376 Have, C. T., and Jensen, L. J. (2013). Are graph databases ready for bioinformatics?  
377 *Bioinformatics* 29, 3107–3108. doi:10.1093/bioinformatics/btt549.
- 378 Huerta-Cepas, J., Szklarczyk, D., Forslund, K., Cook, H., Heller, D., Walter, M. C., et al.  
379 (2016). eggNOG 4.5: a hierarchical orthology framework with improved functional  
380 annotations for eukaryotic, prokaryotic and viral sequences. *Nucleic Acids Res* 44,

- 381 D286–D293. doi:10.1093/nar/gkv1248.
- 382 Hunter, S., Apweiler, R., Attwood, T. K., Bairoch, A., Bateman, A., Binns, D., et al. (2009).  
383 InterPro: the integrative protein signature database. *Nucleic Acids Res* 37, D211–  
384 D215. doi:10.1093/nar/gkn785.
- 385 Itkin, M., Heinig, U., Tzfadia, O., Bhide, A. J., Shinde, B., Cardenas, P. D., et al. (2013).  
386 Biosynthesis of antinutritional alkaloids in solanaceous crops is mediated by  
387 clustered genes. *Science* 341, 175–179. doi:10.1126/science.1240230.
- 388 Jones, P., Binns, D., Chang, H.-Y., Fraser, M., Li, W., McAnulla, C., et al. (2014).  
389 InterProScan 5: genome-scale protein function classification. *Bioinformatics* 30,  
390 1236–1240. doi:10.1093/bioinformatics/btu031.
- 391 Kämper, J., Kahmann, R., Bölker, M., Ma, L.-J., Brefort, T., Saville, B. J., et al. (2006).  
392 Insights from the genome of the biotrophic fungal plant pathogen *Ustilago maydis*.  
393 *Nature* 444, 97–101. doi:10.1038/nature05248.
- 394 Kim, D., Pertea, G., Trapnell, C., Pimentel, H., Kelley, R., and Salzberg, S. L. (2013).  
395 TopHat2: accurate alignment of transcriptomes in the presence of insertions,  
396 deletions and gene fusions. *Genome Biology* 14, R36. doi:10.1186/gb-2013-14-4-r36.
- 397 King, R., Urban, M., Hammond-Kosack, M. C. U., Hassani-Pak, K., and Hammond-Kosack,  
398 K. E. (2015). The completed genome sequence of the pathogenic ascomycete  
399 fungus *Fusarium graminearum*. *BMC Genomics* 16, 544. doi:10.1186/s12864-015-  
400 1756-1.
- 401 Kolesnikov, N., Hastings, E., Keays, M., Melnichuk, O., Tang, Y. A., Williams, E., et al.  
402 (2015). ArrayExpress update—simplifying data submissions. *Nucleic Acids Res* 43,  
403 D1113–D1116. doi:10.1093/nar/gku1057.
- 404 Li, H. (2011). Tabix: fast retrieval of sequence features from generic TAB-delimited files.  
405 *Bioinformatics* 27, 718–719. doi:10.1093/bioinformatics/btq671.
- 406 Li, H., Handsaker, B., Wysoker, A., Fennell, T., Ruan, J., Homer, N., et al. (2009). The  
407 Sequence Alignment/Map format and SAMtools. *Bioinformatics* 25, 2078–2079.  
408 doi:10.1093/bioinformatics/btp352.
- 409 Liu, X., Zhang, X., Tang, W.-H., Chen, L., and Zhao, X.-M. (2013). eFG: an electronic  
410 resource for *Fusarium graminearum*. *Database (Oxford)* 2013.  
411 doi:10.1093/database/bat042.
- 412 Love, M. I., Huber, W., and Anders, S. (2014). Moderated estimation of fold change and  
413 dispersion for RNA-seq data with DESeq2. *Genome Biol* 15. doi:10.1186/s13059-  
414 014-0550-8.
- 415 Mi, H., Muruganujan, A., and Thomas, P. D. (2013). PANTHER in 2013: modeling the  
416 evolution of gene function, and other gene attributes, in the context of phylogenetic  
417 trees. *Nucleic Acids Res.* 41, D377-386. doi:10.1093/nar/gks1118.



- 418 Movahedi, S., Bel, M. V., Heyndrickx, K. S., and Vandepoele, K. (2012). Comparative co-  
419 expression analysis in plant biology. *Plant, Cell & Environment* 35, 1787–1798.  
420 doi:10.1111/j.1365-3040.2012.02517.x.
- 421 Obayashi, T., Hayashi, S., Saeki, M., Ohta, H., and Kinoshita, K. (2009). ATTED-II provides  
422 coexpressed gene networks for Arabidopsis. *Nucleic Acids Res.* 37, D987-991.  
423 doi:10.1093/nar/gkn807.
- 424 Oughtred, R., Stark, C., Breitkreutz, B.-J., Rust, J., Boucher, L., Chang, C., et al. (2019). The  
425 BioGRID interaction database: 2019 update. *Nucleic Acids Res* 47, D529–D541.  
426 doi:10.1093/nar/gky1079.
- 427 Palankar, M. R., Iamnitchi, A., Ripeanu, M., and Garfinkel, S. (2008). Amazon S3 for science  
428 grids: a viable solution? in *Proceedings of the 2008 international workshop on Data-*  
429 *aware distributed computing DADC '08*. (Boston, MA, USA: Association for  
430 Computing Machinery), 55–64. doi:10.1145/1383519.1383526.
- 431 Pedro, H., Maheswari, U., Urban, M., Irvine, A. G., Cuzick, A., McDowall, M. D., et al. (2016).  
432 PhytoPath: an integrative resource for plant pathogen genomics. *Nucleic Acids Res*  
433 44, D688–D693. doi:10.1093/nar/gkv1052.
- 434 Ritchie, M. E., Phipson, B., Wu, D., Hu, Y., Law, C. W., Shi, W., et al. (2015). limma powers  
435 differential expression analyses for RNA-sequencing and microarray studies. *Nucleic*  
436 *Acids Res* 43, e47–e47. doi:10.1093/nar/gkv007.
- 437 Stearman, R., Yuan, D. S., Yamaguchi-Iwai, Y., Klausner, R. D., and Dancis, A. (1996). A  
438 Permease-Oxidase Complex Involved in High-Affinity Iron Uptake in Yeast. *Science*  
439 271, 1552–1557. doi:10.1126/science.271.5255.1552.
- 440 Stuart, J. M., Segal, E., Koller, D., and Kim, S. K. (2003). A Gene-Coexpression Network for  
441 Global Discovery of Conserved Genetic Modules. *Science* 302, 249–255.  
442 doi:10.1126/science.1087447.
- 443 The Complete Genome Sequence of Escherichia coli K-12 | Science Available at:  
444 <https://science.sciencemag.org/content/277/5331/1453> [Accessed August 7, 2019].
- 445 The Gene Ontology Consortium (2019). Gene Ontology Resource: 20 years and still GOing  
446 strong. *Nucleic Acids Res* 47, D330–D338. doi:10.1093/nar/gky1055.
- 447 The Uniprot Consortium (2019). UniProt: a worldwide hub of protein knowledge. *Nucleic*  
448 *Acids Res* 47, D506–D515. doi:10.1093/nar/gky1049.
- 449 Urbanowski, J. L., and Piper, R. C. (1999). The Iron Transporter Fth1p Forms a Complex  
450 with the Fet5 Iron Oxidase and Resides on the Vacuolar Membrane. *J. Biol. Chem.*  
451 274, 38061–38070. doi:10.1074/jbc.274.53.38061.
- 452 Usadel, B., Obayashi, T., Mutwil, M., Giorgi, F. M., Bassel, G. W., Tanimoto, M., et al.  
453 (2009). Co-expression tools for plant biology: opportunities for hypothesis generation  
454 and caveats. *Plant Cell Environ.* 32, 1633–1651. doi:10.1111/j.1365-

- 455 3040.2009.02040.x.
- 456 Virtanen, P., Gommers, R., Oliphant, T. E., Haberland, M., Reddy, T., Cournapeau, D., et al.  
457 (2020). SciPy 1.0: fundamental algorithms for scientific computing in Python. *Nat*  
458 *Methods*, 1–12. doi:10.1038/s41592-019-0686-2.
- 459 Vo, T. V., Das, J., Meyer, M. J., Cordero, N. A., Akturk, N., Wei, X., et al. (2016). A  
460 Proteome-wide Fission Yeast Interactome Reveals Network Evolution Principles from  
461 Yeasts to Human. *Cell* 164, 310–323. doi:10.1016/j.cell.2015.11.037.
- 462 Wicker, T., Oberhaensli, S., Parlange, F., Buchmann, J. P., Shatalina, M., Roffler, S., et al.  
463 (2013). The wheat powdery mildew genome shows the unique evolution of an  
464 obligate biotroph. *Nature Genetics* 45, 1092–1096. doi:10.1038/ng.2704.
- 465 Wolfe, C. J., Kohane, I. S., and Butte, A. J. (2005). Systematic survey reveals general  
466 applicability of “guilt-by-association” within gene coexpression networks. *BMC*  
467 *Bioinformatics* 6, 227. doi:10.1186/1471-2105-6-227.
- 468 Wood, V., Gwilliam, R., Rajandream, M.-A., Lyne, M., Lyne, R., Stewart, A., et al. (2002).  
469 The genome sequence of *Schizosaccharomyces pombe*. *Nature* 415, 871–880.  
470 doi:10.1038/nature724.
- 471 Wood, V., Harris, M. A., McDowall, M. D., Rutherford, K., Vaughan, B. W., Staines, D. M., et  
472 al. (2012). PomBase: a comprehensive online resource for fission yeast. *Nucleic*  
473 *Acids Res* 40, D695–D699. doi:10.1093/nar/gkr853.
- 474 Zhang, L., Zhang, D., Chen, Y., Ye, W., Lin, Q., Lu, G., et al. (2019). Magnaporthe oryzae  
475 CK2 Accumulates in Nuclei, Nucleoli, at Septal Pores and Forms a Large Ring  
476 Structure in Appressoria, and Is Involved in Rice Blast Pathogenesis. *Front. Cell.*  
477 *Infect. Microbiol.* 9. doi:10.3389/fcimb.2019.00113.
